# Supplementary material
Source: PubMed Central journal article supplement (PMC10117289)
Supplement: NIHMS1878760-supplement-Supp_Material.pdf [file NIHMS1878760-supplement-Supp_Material.pdf]

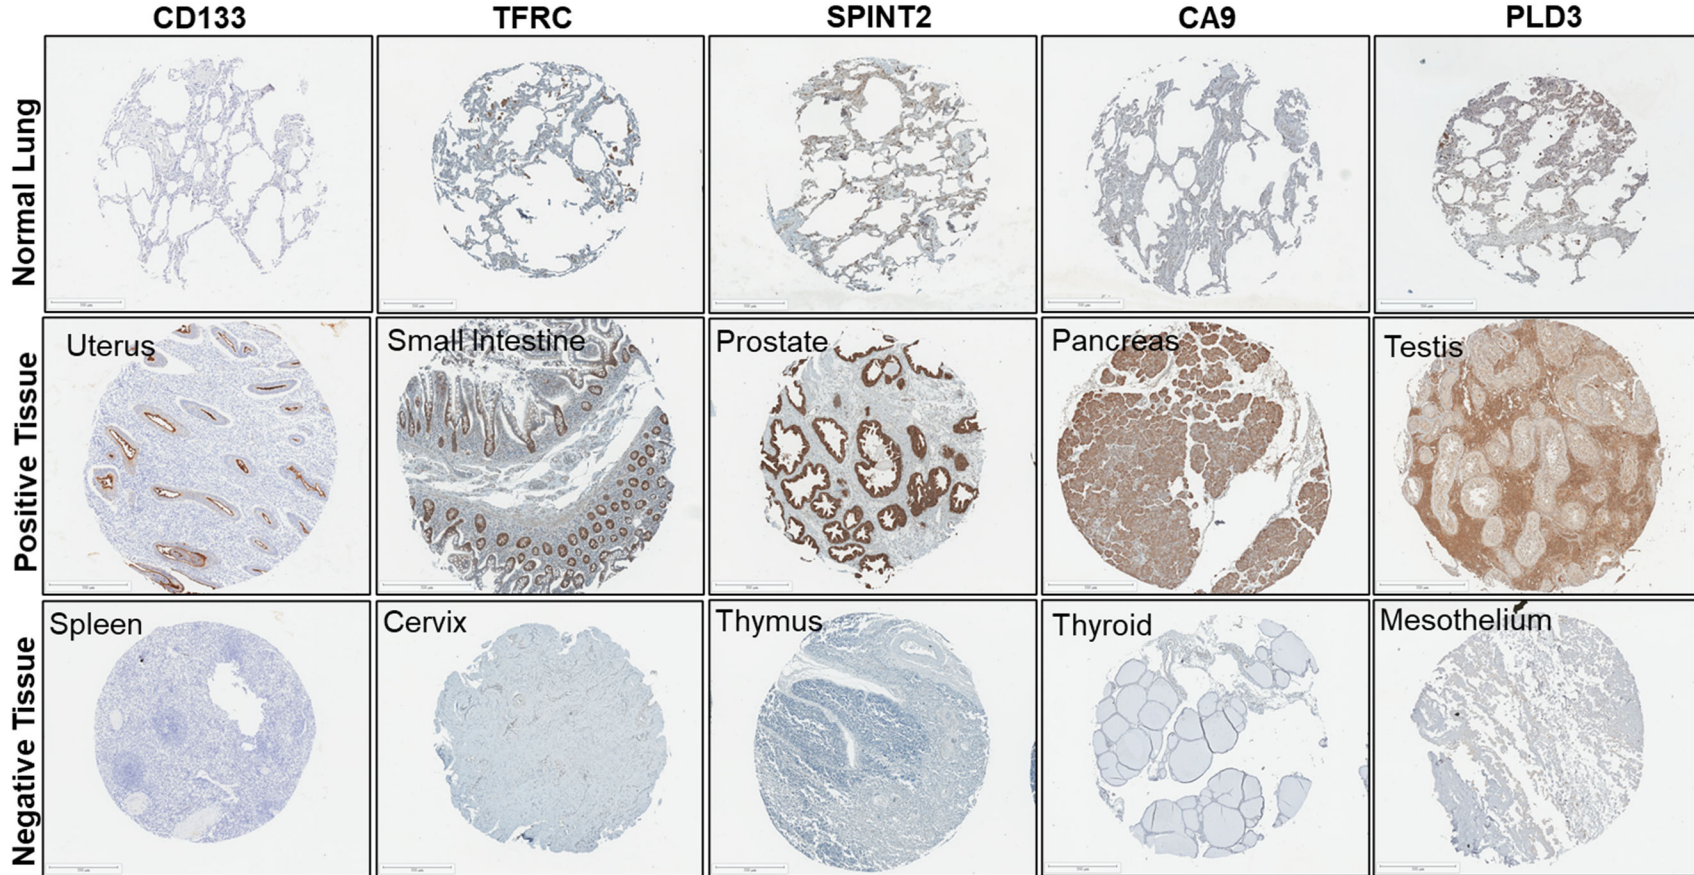

**Fig. S1. Tumor associated antigens are also expressed in some normal tissues.** Representative normal tissue cores that demonstrate both positive and negative expression for each immunohistochemical stain, as well as expression in normal lung cores (Scale bar is 500 $\mu$ M). TFRC, transferrin receptor; SPINT2, serine peptidase inhibitor, Kunitz type 2; CA9, carbonic anhydrase 9; PLD3, phospholipase D3.

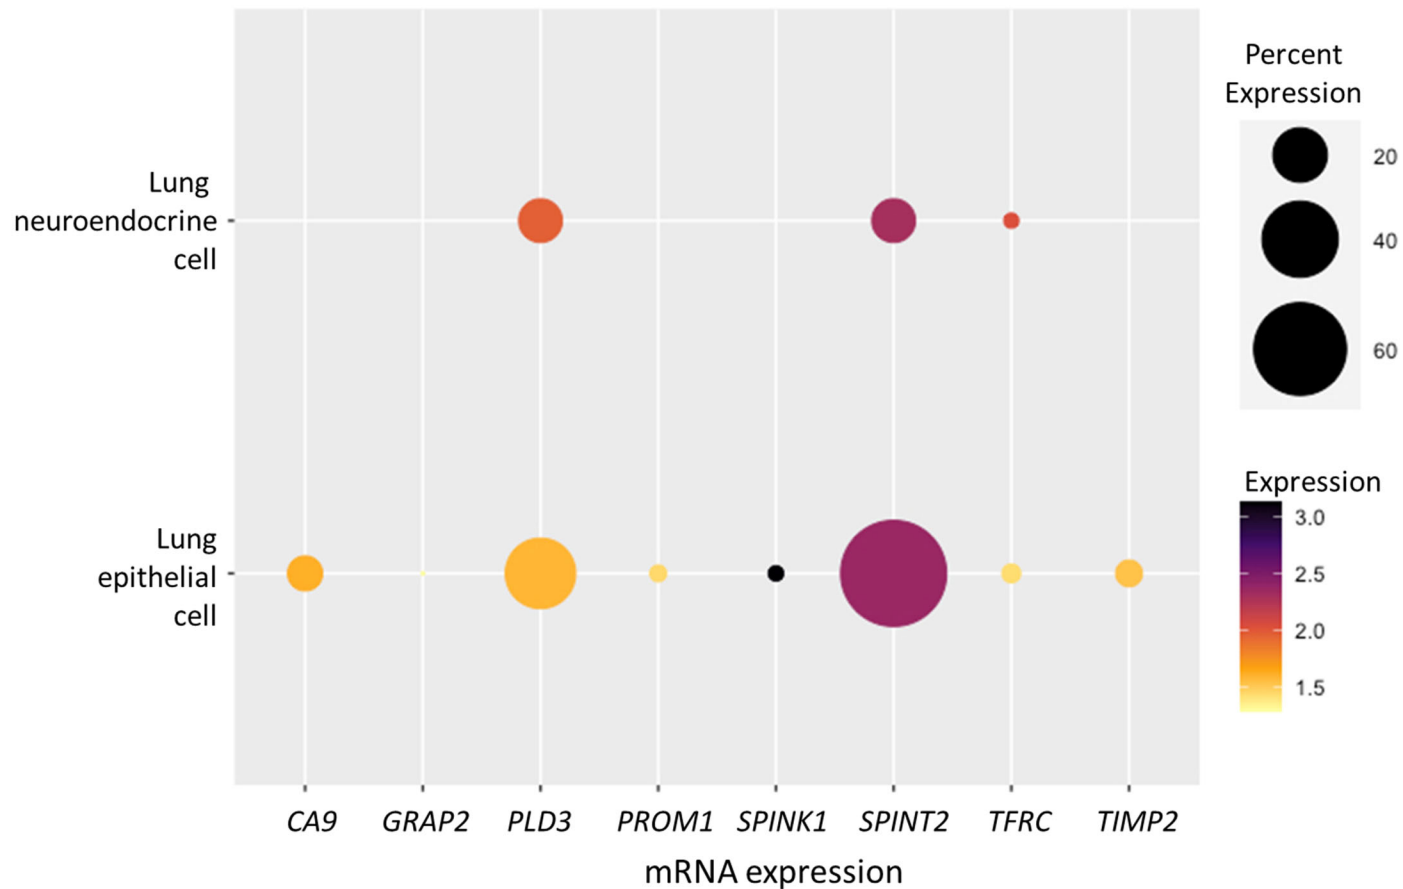

**Fig. S2. Expression of small cell lung cancer (SCLC) biomarkers in healthy lung tissue.** Single-cell RNA sequencing data for lung neuroendocrine and lung epithelial cells was analyzed using the CELLxGENE Gene Expression tool from the Chan Zuckerberg Initiative (<https://cellxgene.cziscience.com/>). Expression values are represented by the circle color and are based on quantile-normalized values with  $<2$  = low expression, 2 to 4 = medium expression, and  $>4$  = high expression. The percentage of all single cells analyzed is represented by circle size.

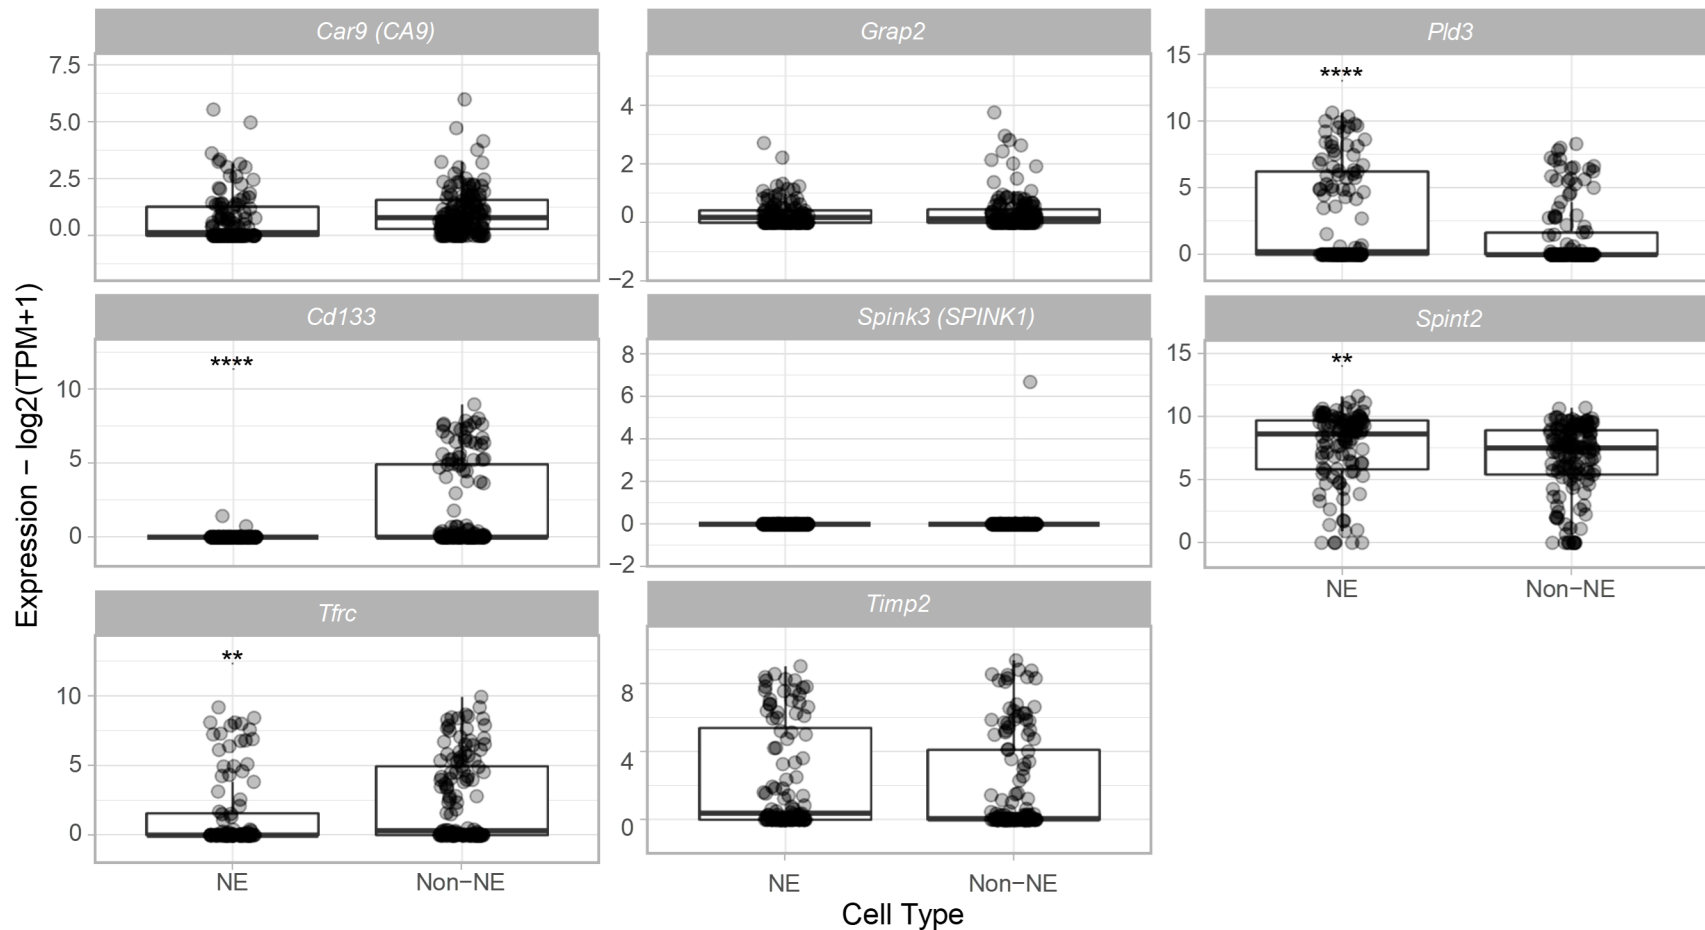

**Fig. S3. Expression of SCLC biomarkers in non-transformed lung tissue from mice.** Single-cell RNA sequencing data for pulmonary neuroendocrine (PNE) and non-neuroendocrine (NE) cells in the lung were analyzed from the GSE136580. *Car9* and *Spink3* are the mouse homologues for human *CA9* and *SPINK1*. Expression values are compared with two-way analysis of variance (ANOVA) with post-hoc Bonferroni adjustment. \*\* $p < 0.01$ , \*\*\*\* $p < 0.0001$ . TPM, transcripts per million. Box and whisker plots indicate the median and upper and lower quartiles.

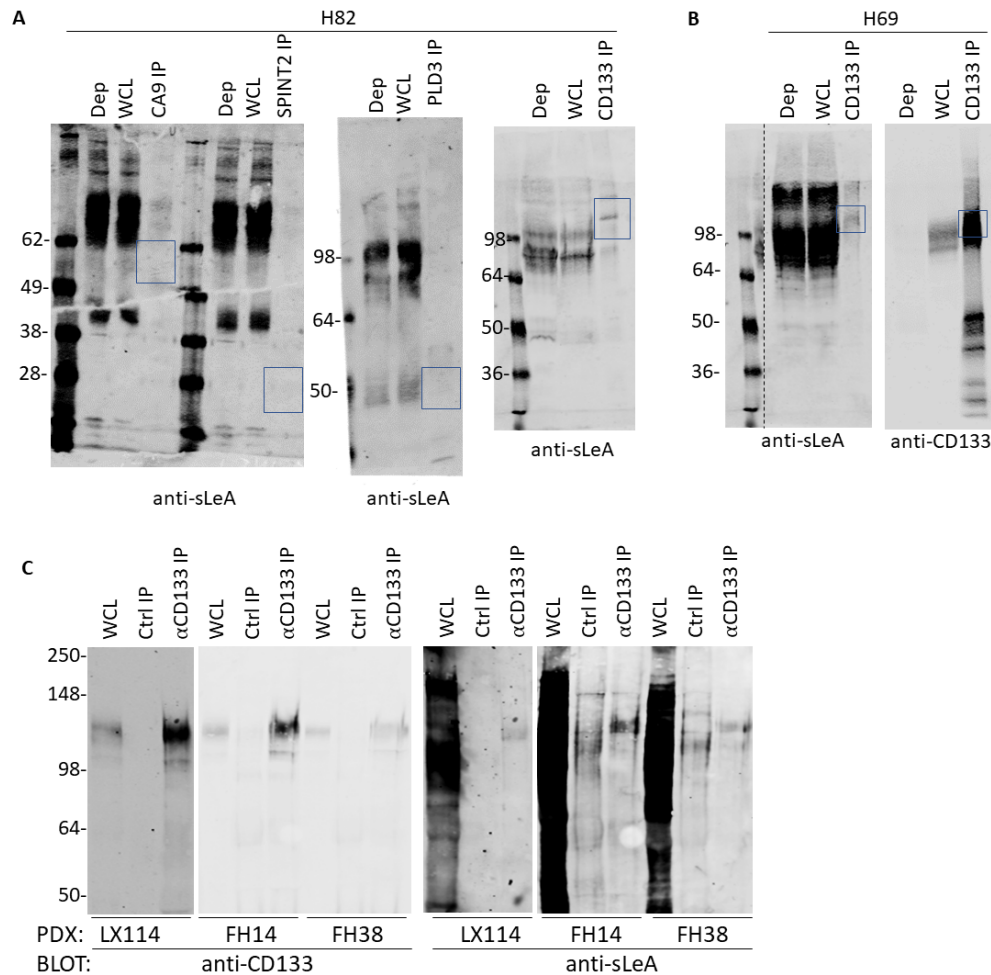

**Fig. S4. CD133 has cancer-specific glycosylation of sLeA SCLC cell lines and patient-derived xenografts (PDXs).** (A). Shown are immunoblots from H82 lysates immunoprecipitated (IP) with CA9, SPINT2, PLD3, or CD133 antibody and probed with anti-SleA antibody. Depleted (Dep), whole cell lysates (WCL) and target-specific IP are shown. Ctrl, control antibody. Blue boxes indicate expected target protein size. (B) Shown are immunoblots from H69 SCLC cell line lysates immunoprecipitated with CD133 antibody and probed with anti-CD133 or anti-sLeA antibodies. (C) Shown are immunoblots from 3 SCLC PDX lysates (LX114, FH14, FH38) immunoprecipitated with CD133 antibody and probed with anti-CD133 and anti-sLeA antibodies.

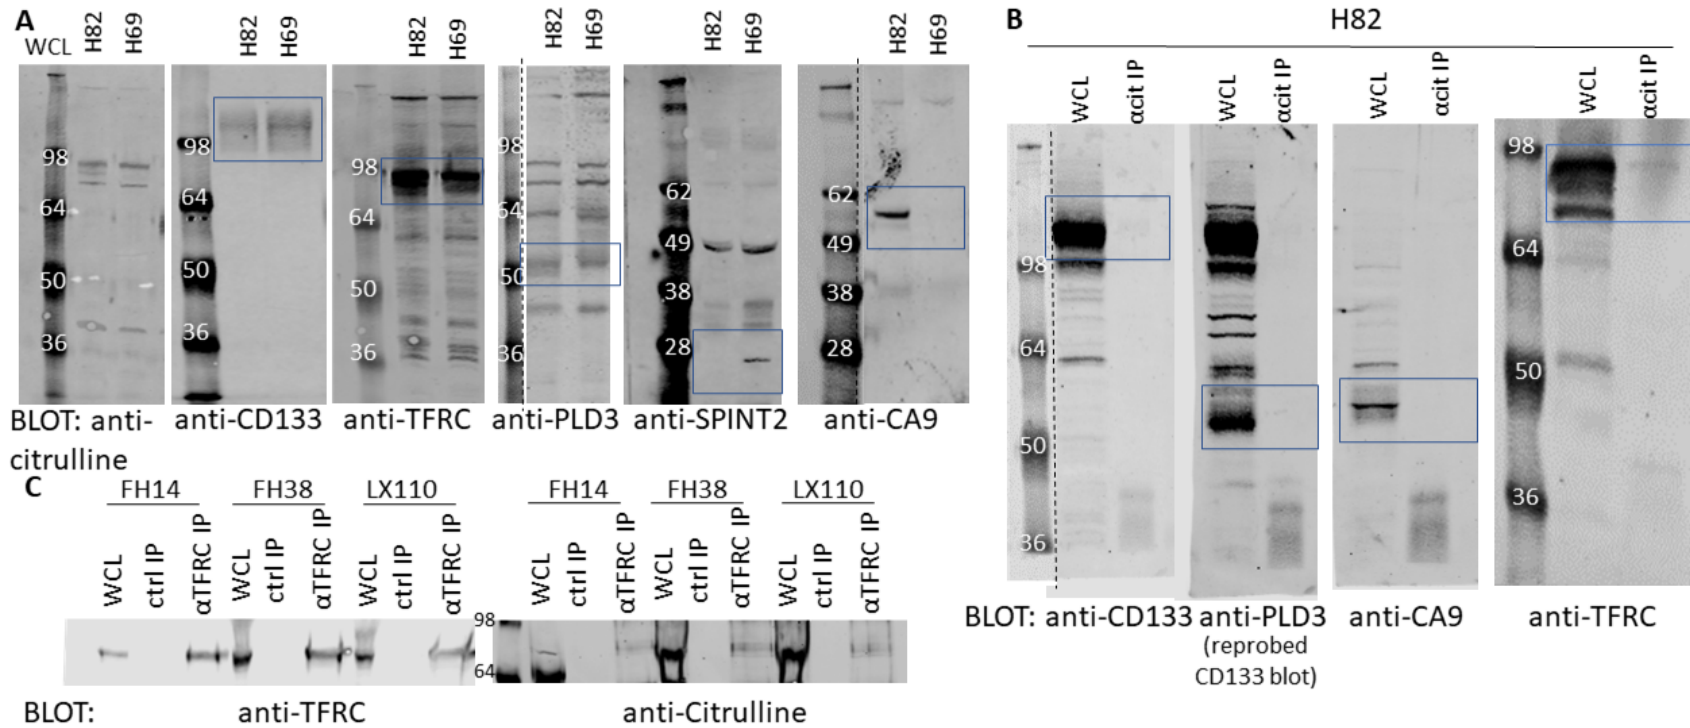

**Fig. S5. TFRC is citrullinated.** (A) Shown are immunoblots from H82 and H69 WCL probed with antibodies to citrulline, CD133, TFRC, PLD3, SPINT2, and CA9. Blue boxes indicate expected target protein size. Cropped versions of anti-Citrulline and anti-TFRC blots are shown in Fig. 5A but the full blots are also shown here for comparison with other target proteins. (B) Immunoblots from H82 lysates immunoprecipitated with citrulline antibody and probed with anti-CD133, PLD3, CA9, or TFRC antibody. CD133 and then PLD3 were used to sequentially probe the same blot. (C) Shown are immunoblots from 3 SCLC PDX lysates immunoprecipitated with TFRC antibody and probed with anti-TFRC and anti-citrulline antibody.

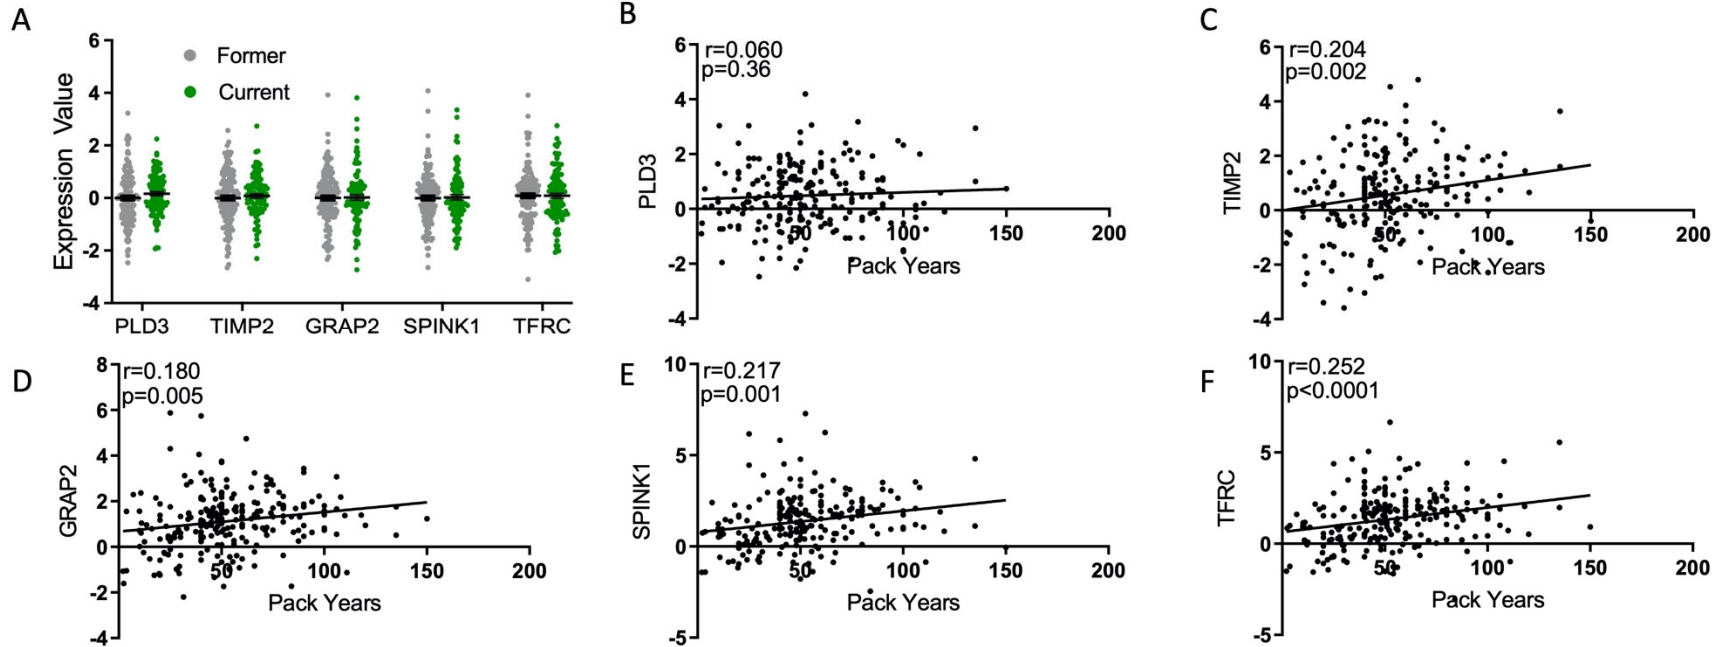

**Fig. S6. Panel autoantibodies are weakly associated with smoking pack years.** (A) Panel autoantibodies are not differentially expressed in current versus former smokers (current  $n=100$ , former  $n=140$ ). Data are presented as mean  $\pm$  SEM. (B to F) Panel autoantibodies including PLD3 (B), TIMP2 (C), GRAP2 (D), SPINK1 (E), and TFRC (F) are loosely correlated with number of smoking pack years. Data were analyzed by Pearson correlation,  $n=240$ . TIMP2, tissue inhibitor of metalloproteinases 2; GRAP2, growth factor receptor-bound protein 2-related adaptor protein 2; SPINK1, serine peptidase inhibitor Kazal type 1.

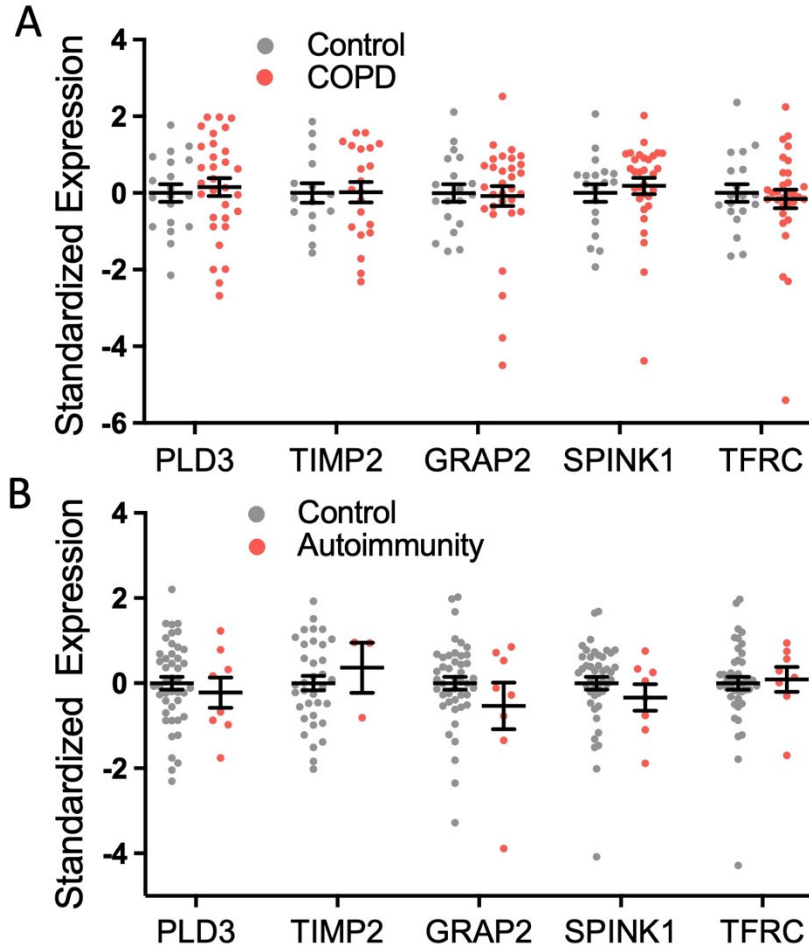

**Fig. S7. Panel autoantibodies are not associated chronic obstructive pulmonary disease (COPD) or autoimmunity.**

Expression of panel autoantibodies are not associated with **(A)** COPD (n=19 controls and 31 cases) or **(B)** autoimmunity [type 1 diabetes (n=3), rheumatoid arthritis (n=2), hypothyroidism (n=2) or myasthenia gravis (n=2)]. One individual had both type 1 diabetes and myasthenia gravis diagnoses (total n=44 controls and 8 cases). Data are presented as mean±SEM.

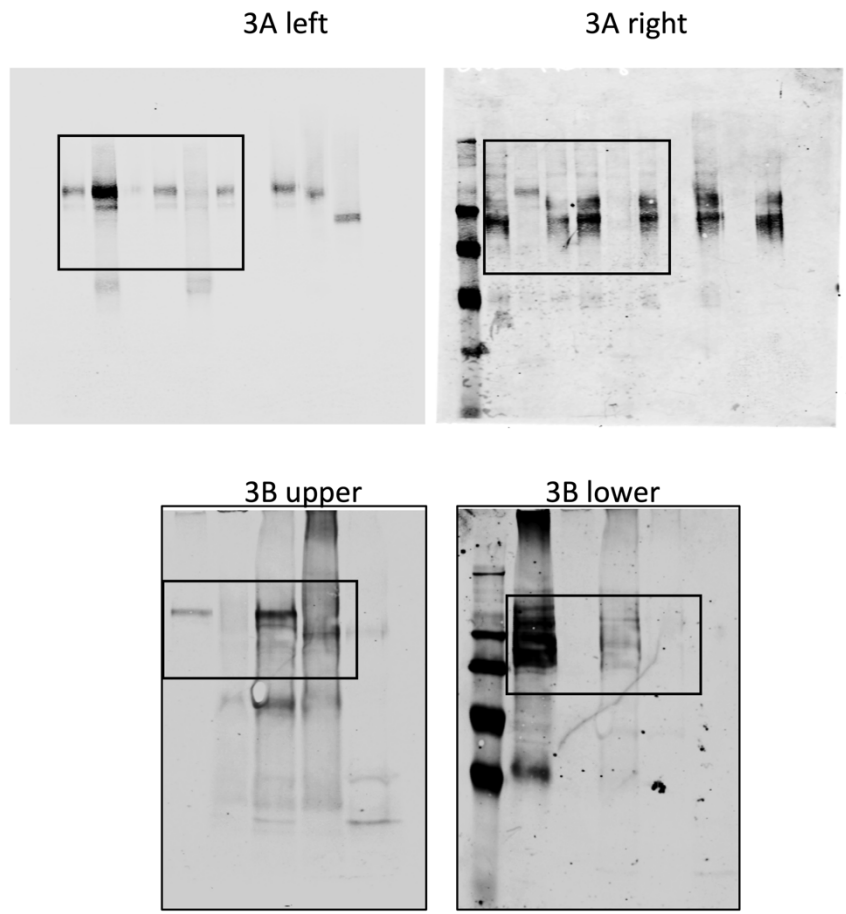

**Fig. S8. Uncropped western blots for Fig. 3.**



Figure 4A upper

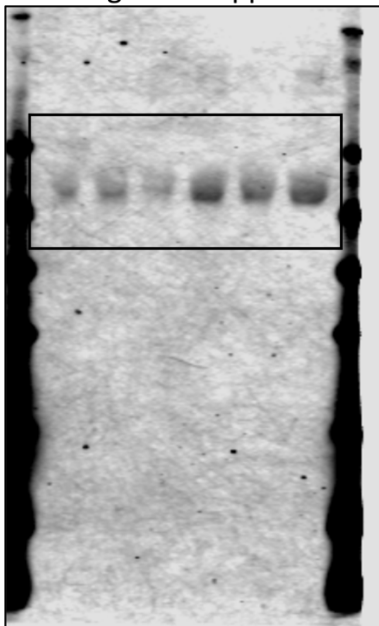

Figure 4A lower

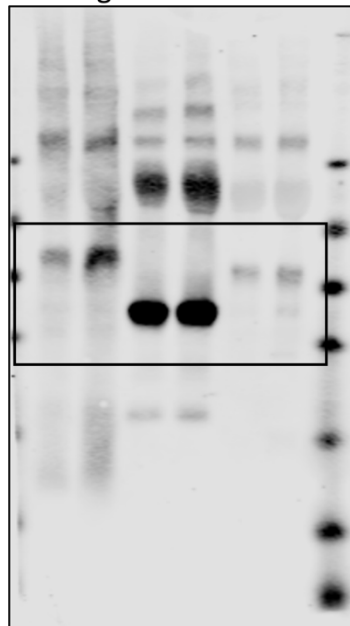

Fig. S9. Uncropped western blots for Fig. 4.

Figure 5A

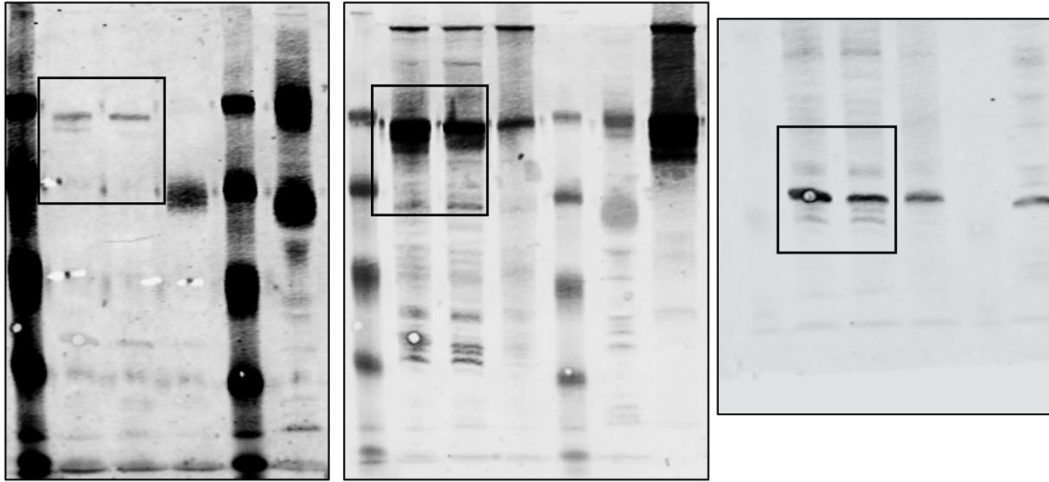

Figure 5B

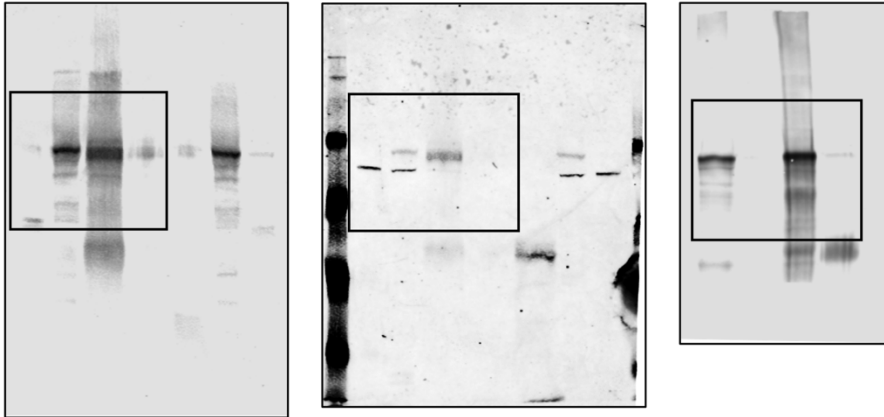

Fig. S10. Uncropped western blots for Fig. 5.

**Table S1. Targets of the upregulated autoantibody (AAb)-antigen (Ag) complexes validated in 3 independent SCLC cohorts broken down time to diagnosis and stage at diagnosis. Coef, coefficient; dx, diagnosis.**

| Validated AAb-Ag Complex Targets | Target Entry Identifier | Mean control coef | Mean 1-2 years to dx coef (p-value) | Mean <1 year to dx coef (p-value) | Mean limited stage coef (p-value) | Mean extensive stage coef (p-value) |
|----------------------------------|-------------------------|-------------------|-------------------------------------|-----------------------------------|-----------------------------------|-------------------------------------|
| CDH5                             | P33151                  | -3.1E-16          | 0.23 (0.270)                        | 1.32 (0.002)                      | 0.58 (0.006)                      | 0.56 (0.003)                        |
| CD133                            | O43490                  | 1.72E-16          | 0.45 (0.244)                        | 1.26 (0.0003)                     | 0.57 (0.006)                      | 0.69 (0.002)                        |
| SPINK1                           | P00995                  | 0.036             | 1.22 (0.19)                         | 1.19 (0.01)                       | 0.50 (0.01)                       | 0.63 (0.002)                        |
| CDH23                            | Q9H251                  | 0.122             | 1.44 (0.02)                         | 0.52 (0.18)                       | 0.54 (0.04)                       | 0.59 (0.01)                         |
| NLRP7                            | Q8WX94                  | -2E-16            | 0.73 (0.06)                         | 0.99 (0.007)                      | 0.58 (0.007)                      | 1.02 (0.0008)                       |
| TFRC                             | P02786                  | -0.091            | -0.38 (0.19)                        | 0.39 (0.08)                       | 0.55 (0.0009)                     | 0.60 (0.0001)                       |
| SPINT2                           | O43291                  | -3.7E-17          | 0.46 (0.20)                         | 1.10 (0.01)                       | 0.90 (0.0004)                     | 0.69 (6.84E-05)                     |
| NADSYN1                          | Q6IA69                  | -2.3E-16          | 0.85 (0.01)                         | 0.90 (0.045)                      | 0.71 (0.002)                      | 0.75 (0.0002)                       |
| HIF1A                            | Q16665                  | 3.01E-16          | 0.62 (0.10)                         | 1.24 (0.02)                       | 0.64 (0.002)                      | 0.93 (9.15E-05)                     |
| GRAP2                            | O75791                  | 0.0053            | 1.36 (0.12)                         | 1.00 (0.02)                       | 0.65 (0.002)                      | 0.76 (0.0008)                       |
| MAPRE1                           | Q15691                  | -0.003            | 0.23 (0.30)                         | 1.25 (0.003)                      | 0.64 (0.002)                      | 0.77 (0.001)                        |
| INHA                             | P05111                  | -1.8E-16          | 0.46 (0.04)                         | 1.03 (0.01)                       | 2.25 (6.06E-07)                   | 2.54 (4.6E-07)                      |
| PTEN                             | P60484                  | -1E-16            | 0.87 (0.07)                         | 1.03 (0.03)                       | 1.30 (3.76E-05)                   | 1.48 (9.6E-06)                      |
| CTSB                             | P07858                  | 0.007             | 0.87 (0.02)                         | 0.81 (0.004)                      | 1.07 (2.41E-06)                   | 1.45 (3.97E-06)                     |
| B3GNT6                           | Q6ZMB0                  | -0.002            | 0.91 (0.008)                        | 0.96 (0.05)                       | 1.13 (4.73E-05)                   | 1.04 (0.0008)                       |
| PLD3                             | Q8IV08                  | 5.8E-08           | 1.14 (0.003)                        | 1.03 (0.0007)                     | 1.43 (7.99E-11)                   | 1.27 (1.4E-07)                      |
| TIMP2                            | P16035                  | -8.2E-08          | 1.37 (0.001)                        | 1.42 (0.0002)                     | 0.85 (5.32E-05)                   | 0.71 (0.0006)                       |
| NUDT5                            | P50583                  | 0.0067            | 0.55 (0.10)                         | 1.04 (0.003)                      | 1.23 (1.44E-07)                   | 1.32 (8.23E-07)                     |
| ANAPC2                           | Q9UJX6                  | -0.00916          | 0.58 (0.06)                         | 0.37 (0.10)                       | 0.35 (0.01)                       | 0.45 (0.02)                         |
| GPLD1                            | P80108                  | 0.0076            | 0.86 (0.04)                         | 0.72 (0.06)                       | 0.95 (5.86E-07)                   | 1.07 (2.18E-05)                     |
| PTPRU                            | Q92729                  | -8.4E-17          | 0.73 (0.004)                        | 0.67 (0.02)                       | 0.27 (0.11)                       | 0.38 (0.05)                         |
| CA9                              | Q16790                  | -0.01862          | 0.30 (0.22)                         | 1.00 (0.02)                       | 0.61 (0.001)                      | 0.61 (0.0005)                       |

**Table S2. Autoantibody identified antigens are not commonly mutated in SCLC cell lines or tumors.**

|                      | <b>Cancer Cell Line Encyclopedia (CCLE) (24-25) (n=51)</b> |                                     | <b>George <i>et al.</i> (26) (n=110)</b> |                               |
|----------------------|------------------------------------------------------------|-------------------------------------|------------------------------------------|-------------------------------|
| <b>Gene</b>          | <b>Number of Variants</b>                                  | <b>Variant Classification</b>       | <b>Number of Variants</b>                | <b>Variant Classification</b> |
| <b><i>TFRC</i></b>   | 1                                                          | 1 missense                          | 3                                        | 3 missense                    |
| <b><i>CD133</i></b>  | 6                                                          | 1 splice site, 2 missense, 3 silent | 2                                        | 1 nonsense, 1 missense        |
| <b><i>SPINT2</i></b> | None                                                       |                                     | None                                     |                               |
| <b><i>CA9</i></b>    | 4                                                          | 1 silent, 3 missense                | 2                                        | 2 missense                    |
| <b><i>PLD3</i></b>   | None                                                       |                                     | None                                     |                               |

**Table S3. Peptide Sequences.** Wildtype (WT) or post-translationally modified (PTM) peptide sequences

| Peptide  | WT Sequence     | PTM Sequence          |
|----------|-----------------|-----------------------|
| SPINT2-1 | NVTDGSC         | NVT{isoAsp}GSC        |
| SPINT2-2 | GGCDGNSN        | GGC{isoAsp}GNSN       |
| SPINT2-3 | GGCDGNSN        | GGCDG{isoAsp}SN       |
| SPINT2-4 | NAADSSVC        | NAA{isoAsp}SSVC       |
| SPINT2-5 | CGNKNSYR        | CGNK{isoAsp}SYR       |
| SPINT2-6 | RRQDSEDC        | RRQ{isoAsp}SEDC       |
| SPINT2-7 | VERN SCN        | VER{isoAsp}SCN        |
| SPINK1-1 | CYNELNGCTKI     | CYNEL{isoAsp}GCTKI    |
| SPINK1-2 | LCFENRKRQT      | LCFE{isoAsp}RKRQT     |
| TIMP2-1  | TQKKSLNHR YQMGC | TQKKSL{isoAsp}HRYQMGC |
| TIMP2-2  | CVTEKNINGHQAKF  | CVTEKNI{isoAsp}GHQAKF |
| TIMP2-3  | CKAEGDGKMHI     | CKAEG{isoAsp}GKMHI    |
| TIMP2-4  | CIKRS DGSCAW    | CIKRS{isoAsp}GSCAW    |
| TIMP2-5  | CEKEVDSGNDI     | CEKEV{isoAsp}SGNDI    |
| TFRC-1   | CDFPAARRLYW     | CDFPAA{Cit}RLYW       |
| TFRC-2   | CDFPAARRLYW     | CDFPAAR{Cit}LYW       |
| TFRC-3   | CNKVARAAA       | CLYSA{Cit}GDF         |
| TFRC-4   | LNDRVMRVEYC     | LNDRM{Cit}VEYC        |
| TFRC-5   | LNDRVMRVEYC     | LND{Cit}VMRVC         |
| TFRC-6   | CLYSARGDFFRATS  | CGDFF{Cit}ATS         |
| TFRC-7   | CNKVARAAA       | CNKVA{Cit}AAA         |
